# Supplementary material for: Fabrication of ternary composites with polymeric carbon nitride/MoS2/reduced graphene oxide ternary hybrid aerogel as high-performance electrode materials for supercapacitors
Source: Royal Society of Chemistry journal article supplement (doi:10.1039/d1nj02960f), 2021-01-01
Supplement: d1nj02960f1.pdf [file d1nj02960f1.pdf]

## Fabrication of Ternary Composite with Polymeric carbon nitride/MoS<sub>2</sub>/reduced graphene oxide Ternary Hybrid Aerogel as High Performance Electrode Materials for Supercapacitors

Marilyn Mary Xavier,<sup>a</sup> S. Mohanapriya,<sup>c</sup> Reshma Mathew,<sup>a</sup> Nayarassery N. Adarsh,<sup>a</sup> P. Radhakrishnan Nair<sup>a</sup> and Suresh Mathew<sup>\*,a,b</sup>

<sup>a</sup>Advanced Molecular Materials Research Centre (AMMRC), Mahatma Gandhi University, Kottayam, 686560, Kerala, India, E-mail: sureshmathewmgu@gmail.com

<sup>b</sup>School of Chemical Sciences, Mahatma Gandhi University, Kottayam, 686560, Kerala, India

<sup>c</sup>CSIR-Central Electro Chemical Research Institute, College Road, Karaikudi, Tamil Nadu, 630003, India

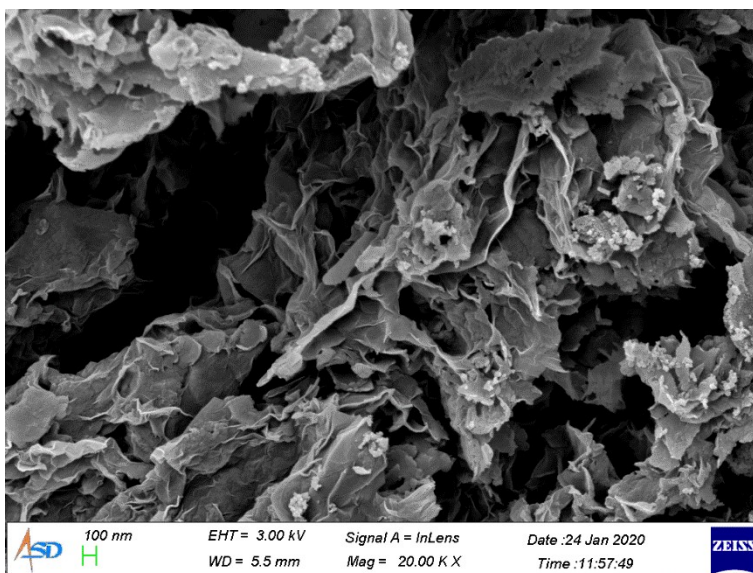

Figure S1: FE-SEM images of CMGA-1

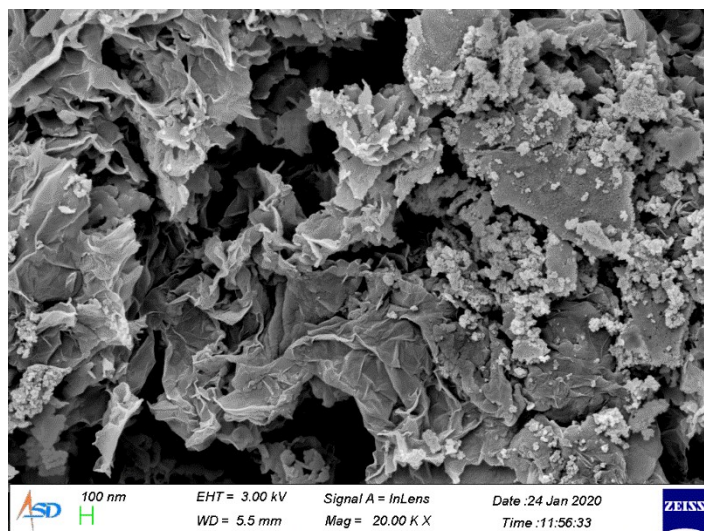

Figure S2: FE-SEM images of CMGA-2
